# Supplementary material for: GSK2593074A blocks progression of existing abdominal aortic dilation
Source: PubMed Central journal article supplement — JVS Vasc Sci. 2020 Jul 28;1:123–35. doi: 10.1016/j.jvssci.2020.07.001 (PMC7872141; doi:10.1016/j.jvssci.2020.07.001), 2020-07-28
Supplement: NIHMS1665725-supplement-1.pdf [file NIHMS1665725-supplement-1.pdf]

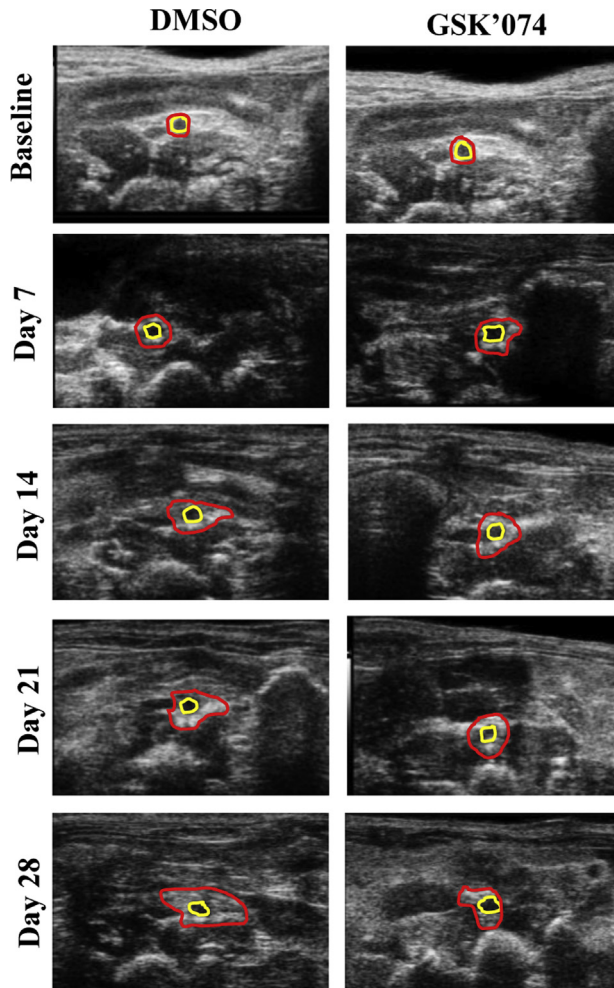

**Supplementary Fig 1.** Representative axial ultrasound images of dimethylsulfoxide (*DMSO*) and GSK2593074A (*GSK'074*)-treated mice 7 days after aneurysm induction.

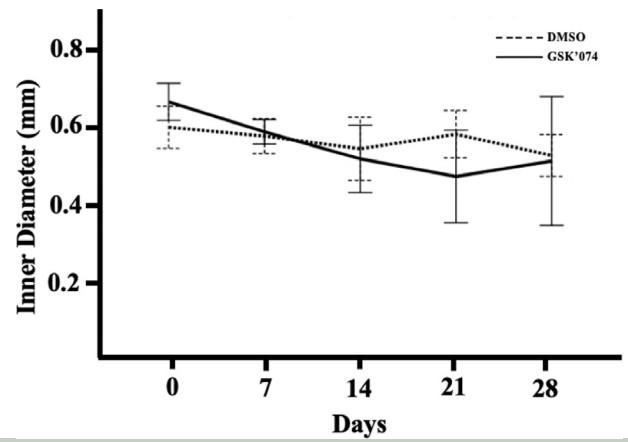

**Supplementary Fig 2.** Internal aortic diameter measured from ultrasound images over the course of the study period. There were no differences in internal diameter between the GSK2593074A (*GSK'074*) and dimethylsulfoxide (*DMSO*)-treated groups. Data are presented as mean  $\pm$  standard error. Two-way analysis of variance with a post hoc Tukey's test was performed.
